# Supplementary material for: Healthy Lifestyle Behaviours Are Associated with Children’s Psychological Health: A Cross-Sectional Study
Source: MDPI journal article supplement (doi:10.3390/ijerph17207509), 2020-10-15
Supplement: s1 [file s1]

## Supplementary Material

**Table 1.** Healthy lifestyle behaviour cut-offs used in the analysis (half serves in the recommendations were rounded up to whole serves).

| Indicator                                   | Healthy<br>(met indicator) | Unhealthy (did not meet indicator) |
|---------------------------------------------|----------------------------|------------------------------------|
| Fruit recommendations (serves per day)      |                            |                                    |
| 5-8 years                                   | $\geq 2^a$                 | $< 2$                              |
| 9-15 years                                  | $\geq 2$                   | $< 2$                              |
| Vegetables recommendations (serves per day) |                            |                                    |
| 5-8 years                                   | $\geq 5^b$                 | $< 5$                              |
| 9-11 years                                  | $\geq 5$                   | $< 5$                              |
| 12-15 years, girls                          | $\geq 5$                   | $< 5$                              |
| 12-15 years, boys                           | $\geq 6^c$                 | $< 6$                              |
| Discretionary foods (serves per week)       |                            |                                    |
| 5-15 years                                  | $\leq 3$                   | $> 3$                              |
| Average time in PA/day (minutes)            |                            |                                    |
| 5-15 years                                  | $\geq 60$                  | $< 60$                             |
| Average time screen time/day (hours)        |                            |                                    |
| 5-15 years                                  | $< 2$                      | $\geq 2$                           |

<sup>a</sup> 1.5 in National Health and Medical Research Committee (NHMRC) Dietary Guidelines (27).

<sup>b</sup> 4.5 in National Health and Medical Research Committee (NHMRC) Dietary Guidelines (27).

<sup>c</sup> 5.5 in National Health and Medical Research Committee (NHMRC) Dietary Guidelines (27).

**Table 2.** Unadjusted associations between diet/physical activity indicators and scoring in the at-risk range for each of the Strength and Difficulty Questionnaire (SDQ) subscales.

| Indicator                      | Emotional Symptoms  |                     | Conduct Problems     |                     | Hyper-activity      |                      | Peer Problems        |                      | Prosocial Behaviour  |                      |
|--------------------------------|---------------------|---------------------|----------------------|---------------------|---------------------|----------------------|----------------------|----------------------|----------------------|----------------------|
|                                | OR (95% CI)         |                     | OR (95% CI)          |                     | OR (95% CI)         |                      | OR (95% CI)          |                      | OR (95% CI)          |                      |
|                                | 5-10 years          | 11-15years          | 5-10years            | 11-15years          | 5-10years           | 11-15years           | 5-10years            | 11-15years           | 5-10years            | 11-15years           |
| Met fruit recommendation       | 0.70<br>(0.42,1.17) | 0.73<br>(0.45-1.19) | 0.83<br>(0.45,1.54)  | 0.67<br>(0.33-1.33) | 0.70<br>(0.43-1.14) | 1.19<br>(0.67-2.09)  | 0.49<br>(0.26-0.92)* | 0.75<br>(0.44-1.26)  | 0.83<br>(0.27-2.56)  | 1.16<br>(0.44-3.08)  |
| Met vegetable recommendation   | 0.36<br>(0.07,1.91) | 0.67<br>(0.23-2.01) | 0.57<br>(0.14,2.38)  | 0.41<br>(0.12-1.46) | 0.46<br>(0.17-1.27) | 0.45<br>(0.16-1.33)  | 0.97<br>(0.29-3.25)  | 1.04<br>(0.38-2.82)  | NA#                  | 0.34<br>(0.6-1.92)   |
| Met discretionary food limit   | 0.82<br>(0.49,1.36) | 0.78<br>(0.48-1.27) | 0.44<br>(0.22,0.88)* | 0.53<br>(0.27-1.04) | 0.61<br>(0.37-1.00) | 0.64<br>(0.37-1.12)  | 0.71<br>(0.37-1.34)  | 0.73<br>(0.44-1.23)  | 0.06<br>(0.02-0.18)* | 0.62<br>(0.21-1.83)  |
| Met PA recommendation          | 0.60 (0.36-1.02)    | 0.74<br>(0.43-1.27) | 0.67 (0.36-1.26)     | 0.89<br>(0.44-1.82) | 1.20<br>(0.72-1.99) | 0.92<br>(0.52-1.63)  | 0.61<br>(0.32-1.16)  | 0.37<br>(0.20-0.70)* | 0.74<br>(0.24-2.27)  | 0.95<br>(0.33-2.72)  |
| Met screen time recommendation | 0.46 (0.27-0.78)*   | 0.61<br>(0.36-1.04) | 0.42 (0.22-0.80)*    | 0.70<br>(0.33-1.48) | 0.44 (0.26-0.72)*   | 0.53<br>(0.29-0.96)* | 0.35<br>(0.18-0.69)* | 0.68<br>(0.38-1.20)  | 0.18<br>(0.06-0.56)* | 0.25<br>(0.06-0.97)* |

\*p<0.05, #Insufficient responses to report this measure.

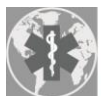

**Table 3.** Demographics included in multivariable analysis of diet and physical activity factors predictive of total difficulties score in children aged 5–15 years, stratified by age.

| Mean Score Difference                                         |                        |                       |
|---------------------------------------------------------------|------------------------|-----------------------|
|                                                               | 5–10 years             | 11–15 years           |
| Sex (ref: female)                                             | -1.59 (-2.65, -0.55)** | -1.26 (-2.41, -0.10)* |
| Mother completed high school/diploma (ref: University degree) | 0.36 (-1.34, 2.05)     | 3.45 (1.80, 5.09) *** |
| Mother completed year 10 or below (ref: University degree)    | 1.26 (0.16, 2.35)**    | 1.03 (0.01, 2.06)*    |
| Age                                                           | -0.01 (-0.26, 0.25)    | -0.21 (-0.56, 0.15)   |
| Single parent family                                          | 1.93 (0.71, 3.14)*     | 2.08 (0.69, 3.46)**   |
| Living regional or remote (ref: Major cities)                 | -1.27 (-2.22, -0.32)** | 0.63 (-0.55, 1.80)    |
| BMI: overweight/obese                                         | 0.54 (-0.61, 1.70)     | 1.15 (-0.57, 2.87)    |

\*\*\* =  $P < 0.001$ , \*\* =  $P < 0.01$ , \* =  $P < 0.05$ . All factors were included in a single multivariable model, adjusted for age, sex, BMI, mother's highest qualification, family structure (single parent family), and remoteness.
